# Supplementary material
Source: publisher figshare collection journal article supplement (https://acs.figshare.com/ndownloader/files/5124397)
Supplement: Supplementary file 1 [file 5124397]

## Supporting Information

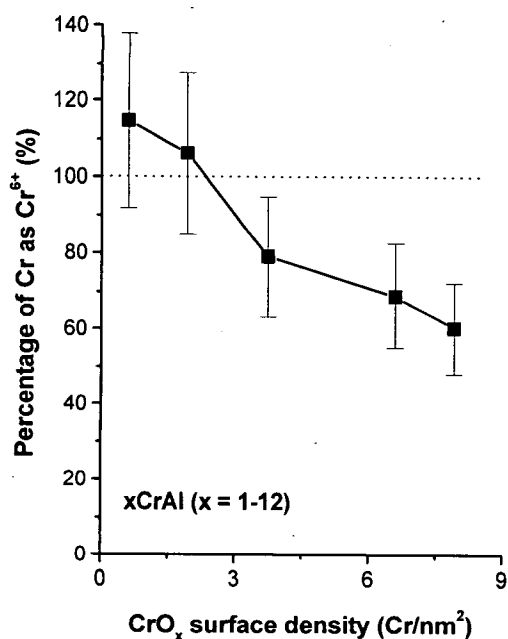

Figure 1S Percentage of Cr as Cr<sup>6+</sup> in xCrAl catalysts as calculated from TPR data (dividing real consumed H<sub>2</sub> by theoretical value). It is assumed that all Cr<sup>6+</sup> were reduced to Cr<sup>3+</sup>.

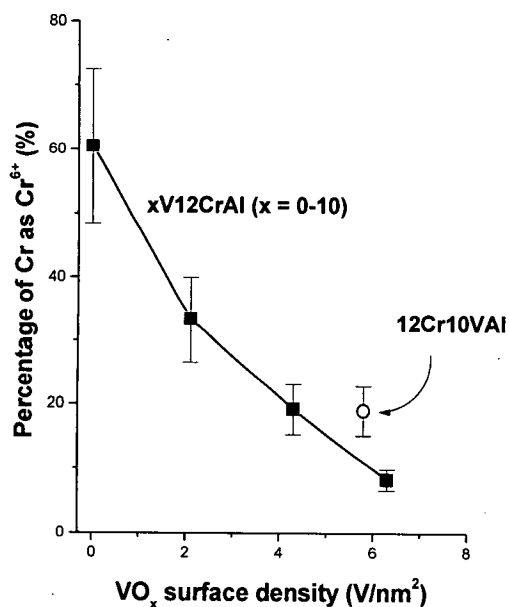

Figure 2S Percentage of Cr as Cr<sup>6+</sup> in 12CrAl, xV12CrAl and 12Cr10VAI catalysts as calculated from TPR data (dividing real consumed H<sub>2</sub> by theoretical value). It is assumed that all Cr<sup>6+</sup> were reduced to Cr<sup>3+</sup>.
